# Two Frog Melanotrope Cell Subpopulations Exhibiting Distinct Biochemical and Physiological Patterns in Basal Conditions and under Thyrotropin-Releasing Hormone Stimulation\*

JOSE LUIS GONZALEZ DE AGUILAR, MARIA M. MALAGON,  
RAFAEL M. VAZQUEZ-MARTINEZ, ISABELLE LIHRMANN,  
MARIE-CHRISTINE TONON, HUBERT VAUDRY, AND  
FRANCISCO GRACIA-NAVARRO

*Department of Cell Biology, University of Córdoba (J.L.G.d.A., M.M.M., R.M.V.M., F.G.N.), Córdoba, Spain; and European Institute for Peptide Research, Institut Fédératif de Recherches Multidisciplinaires sur les Peptides 23, Laboratory of Cellular and Molecular Neuroendocrinology, INSERM U-413, Unité Affiliée au Centre National de la Recherche Scientifique, University of Rouen (I.L., M.C.T., H.V.), Mont-Saint-Aignan, France*

## ABSTRACT

Cell heterogeneity designates the phenomenon by which a particular cell type is composed of morphologically and physiologically distinct cell subpopulations. We have previously isolated two subsets of melanotrope cells in the intermediate lobe of the frog pituitary by means of a separation procedure based on a Percoll density gradient. High density (HD) melanotrope cells were found to exhibit a more granulated cytoplasm and a lower secretory rate than low density (LD) cells. In the present study, we have investigated the biochemical and functional characteristics of each melanotrope cell subpopulation by using various approaches, including chromatographic analysis for the measurement of the proportion of acetylated  $\alpha$ MSH, microfluorimetric measurement of the cytosolic free calcium concentration ( $[Ca^{2+}]_i$ ), and *in situ* hybridization for quantification of POMC mes-

senger RNA (mRNA). Under basal conditions, LD melanotrope cells showed higher secretory activity, acetylation rate,  $[Ca^{2+}]_i$ , and POMC mRNA content compared to HD cells. Incubation of the cells with 100 nM TRH for 2 h induced a more pronounced activation of  $\alpha$ MSH secretion,  $[Ca^{2+}]_i$  mobilization, and POMC mRNA accumulation in LD than in HD melanotrope cells. Conversely, TRH increased the rate of acetylation of  $\alpha$ MSH in HD cells, but did not affect acetylation in LD cells. Taken together, these results demonstrate that the frog intermediate lobe is composed of two subsets of endocrine cells with distinct biochemical and functional characteristics. The coexistence of two cell subpopulations in the frog pars intermedia is consistent with the idea of a cell secretory cycle, in which each melanotrope subset represents a specific state of cellular activity. (*Endocrinology* **138**: 970–977, 1997)

THE DISTAL lobe of the pituitary is a complex and heterogeneous organ comprising several endocrine cell types that produce different hormones (1). In addition, numerous studies have shown that each pituitary cell type is not a pool of homogeneous and synchronized cells, but is composed of subsets of morphologically and physiologically distinct endocrine cells (2–5). This phenomenon, named cell heterogeneity, has been evaluated in various adenohypophyseal cell types with respect to morphofunctional and ultrastructural characteristics (6, 7), secretory activity (8, 9), response to secretagogues (10–12), and hormone gene expression (13, 14).

The intermediate lobe of the rat pituitary is composed of

two cell types, *i.e.* melanotrope and corticotrope cells (15), which both synthesize the precursor protein POMC (16). The intermediate lobe of amphibians, which consists of a single endocrine cell type, the melanotrope cells (17), represents a valuable model in which to investigate the phenomenon of cell heterogeneity. Posttranslational processing of POMC in amphibian melanotrope cells generates several biologically active peptides, including  $\alpha$ MSH and  $\beta$ -endorphin (18, 19). The hormone  $\alpha$ MSH, which causes dispersion of the pigment melanin in dermal melanophores, plays a pivotal role in the control of background color adaptation (20). N-Terminal acetylation of  $\alpha$ MSH is an important processing event that increases the melanotropic activity of the peptide (21). In anuran amphibians, the major intracellular form of the peptide is des- $N^\alpha$ -acetyl  $\alpha$ MSH, and the acetylation reaction to generate  $\alpha$ MSH is associated with the secretory process (22–24). It has also been demonstrated that  $N^\alpha$ -acetylation is physiologically regulated by background adaptation (25) or hypothalamic neurohormones (26, 27).

The secretory activity of frog melanotrope cells is regulated by multiple factors, including classical neurotransmitters and neuropeptides (see Ref. 28 for review). In particular, TRH is a potent stimulator of  $\alpha$ MSH secretion from amphib-

Received September 9, 1996.

Address all correspondence and requests for reprints to: Dr. Francisco Gracia-Navarro, Department of Cell Biology, Faculty of Sciences, Avda. San Alberto Magno s/n, University of Córdoba, E-14004 Córdoba, Spain. E-mail: bc1grnaf@uco.es.

\* This work was supported by Dirección General de Investigación Científica y Técnica (Grant PB 94–0451-CO2-01), European Union Human Capital and Mobility Program (Contract ERBCHRXCT920017), and the Spain-France Exchange Program (310B). Presented in part at the 77th Annual Meeting of The Endocrine Society, Washington, D.C., 1995, and the 18th ESCE Conference, Rouen, France, 1996.

ian intermediate lobe (29–31). The effect of TRH on melanotrope cells is mediated through activation of phospholipase C and mobilization of intracellular calcium stores (32).

Heterogeneity of rat melanotrope cells has previously been reported with respect to secretory activity (33) and POMC gene expression (34). Recently, two subpopulations of melanotrope cells have been isolated in the intermediate lobe of *Rana ridibunda* after separation of dispersed cells with a continuous Percoll density gradient (35). These melanotrope cell subsets, referred to as high density (HD) and low density (LD) cells, differ in both secretory granule content and spontaneous  $\alpha$ MSH secretion; HD cells have a more granulated cytoplasm and a substantially lower secretory activity than LD cells.

The aim of the present study was to compare the biochemical and physiological characteristics of HD and LD cells. For each subpopulation, we investigated the secretory activity, the cytosolic calcium concentration ( $[Ca^{2+}]_i$ ) and the POMC messenger RNA (mRNA) density under basal and TRH-stimulated conditions. In addition, we compared the rates of acetylation of  $\alpha$ MSH in HD and LD melanotrope cells.

## Materials and Methods

### Animals

Adult male frogs (*Rana ridibunda*) of about 40 g body weight were purchased from a commercial supplier (Couéard, Saint-Hilaire de Riez, France). The animals were maintained under running water at a constant temperature (8 C) with a 12-h light, 12-h dark cycle for at least 1 week before death. The frogs were killed by decapitation between 0800–0900 h, and the neurointermediate lobes were dissected under a microscope. Animal manipulations were performed according to the recommendations of the local ethical committees and under the supervision of authorized investigators.

### Reagents and test substances

Collagenase type V, trypsin type I, BSA, Leibovitz culture medium, and antibiotic-antimycotic solution were purchased from Sigma Chemical Co. (St. Louis, MO). Indo-1 acetoxymethylester, pluronic F127, and the calcium ionophore A-23187 were obtained from Molecular Probes (Eugene, OR). TRH was purchased from PREM (Zyma Farmacéutica, Barcelona, Spain). Percoll was obtained from Pharmacia LKB (Uppsala, Sweden). FBS was obtained from Sera-Lab (Crawley Down, UK).

### Isolation and separation of melanotrope cells

Isolated melanotrope cells were obtained using a dispersion protocol described previously (35). Briefly, 40 neurointermediate lobes were collected for each experiment and enzymatically dissociated by incubation at 26 C in culture medium containing 0.2% (wt/vol) collagenase type V and 0.2% (wt/vol) trypsin type I for 45 min. The culture medium consisted of Leibovitz culture medium diluted 2:3 (to adjust to *Rana ridibunda* osmolality) and supplemented with 1 mM glucose, 0.4 mM  $CaCl_2$ , and 1% (vol/vol) antibiotic-antimycotic solution, pH 7.4. The dissociation was continued in the same medium supplemented with 2 mM EDTA for 5 min and with 1 mM EDTA for 5 min. Then, the tissues were mechanically dispersed using a siliconized Pasteur pipette until a homogeneous cellular suspension was obtained. Cell viability, as determined by the trypan blue exclusion test (36), was 89%.

A density gradient of Percoll was prepared as previously described (35). A hyperbolic gradient was obtained by mixing 6 ml of a 50% Percoll solution with 3 ml of a 15% Percoll solution at a rate of 0.25 ml/min. A 250- $\mu$ l sample of the cellular suspension ( $2.2 \times 10^6$  cells) was carefully loaded on top of the gradient. After centrifugation ( $3,000 \times g$  for 25 min; 4 C), nine fractions of 1 ml each were collected manually. Cells contained in fractions 1 (bottom of the gradient) and 4 plus 5 contained the HD and

LD cell subpopulations, respectively. HD melanotrope cells represented 20.8% of the total cells recovered from the gradient, whereas LD cells represented 52.1%.

### Culture of melanotrope cell subpopulations

Primary culture of each melanotrope cell subset was performed to evaluate their functional characteristics under both basal and TRH-stimulated conditions. Aliquots of 30,000 cells were plated on 35-mm petri dishes and incubated at 26 C in 2 ml culture medium supplemented with 10% FBS. After 48 h, the medium was removed, and the cells were preincubated in 1 ml serum-free culture medium for 2 h. The cells were incubated for another 2 h with 1 ml medium in the absence or presence of 100 nM TRH. Medium samples were collected and centrifuged at  $60 \times g$  for 5 min, and the supernatants were stored at  $-20$  C until hormone assay. After culture, cells were processed for *in situ* hybridization. To determine the  $[Ca^{2+}]_i$ , cells were plated on microgrid coverslips (Eppendorf, Netheler, Germany) at a density of 5000 cells/well and incubated in 2 ml culture medium supplemented with 10% FBS for 3–5 days until  $[Ca^{2+}]_i$  measurement.

### HPLC

Incubation media were first prepurified on Sep-Pak cartridges (Alltech Europe, Laarne, Belgium). Each sample was then subjected to reverse phase HPLC analysis on Lichrosorb RP-18 column ( $0.46 \times 25$  cm; Merck, Paris, France) using a gradient established with 0.1% trifluoroacetic acid (vol/vol; pH 2.4) and a mixture of acetonitrile-methanol (80:20, vol/vol). The column was equilibrated with 25% acetonitrile-methanol and eluted at a flow rate of 1 ml/min using the gradient shown in Fig. 2. The following synthetic standards were analyzed using the same gradient: des- $N^{\alpha}$ -acetyl  $\alpha$ MSH,  $\alpha$ MSH, and diacetyl  $\alpha$ MSH, as well as their respective sulfoxide derivatives. Oxidation of the synthetic standards was performed using hydrogen peroxide as described previously (37). Fractions were collected every 1 min and dried in a Speed-Vac concentrator (Savant, Hicksville, NY).

### $\alpha$ MSH RIA

The concentrations of  $\alpha$ MSH-related peptides in the culture media and HPLC fractions were measured using a double antibody RIA method described previously (38). The sensitivity of the assay was 3 pg/tube. The  $\alpha$ MSH antiserum exhibited full cross-reactivity with des- $N^{\alpha}$ -acetyl  $\alpha$ MSH,  $\alpha$ MSH, and diacetyl  $\alpha$ MSH. The cross-reactivity of the antiserum with other POMC-derived peptides was lower than 0.1%.

### Measurement of cytosolic calcium concentration

Cultured cells were first incubated with 5  $\mu$ M indo-1 acetoxymethylester and 0.02% (vol/vol) Pluronic F127 in culture medium for 30 min at 22 C in the dark. The cells were washed twice with fresh medium, and  $[Ca^{2+}]_i$  was monitored by a dual wavelength microfluorimetry system constructed from an inverted microscope equipped with a fluor  $\times 40$  objective in the epifluorescence mode (Nikon Corp., Tokyo, Japan). The fluorescence emission of indo-1 induced by excitation at 355 nm was recorded at two wavelengths (405 and 485 nm) by separate photometers as previously described (39). After conversion of photon currents to voltage signals, both 405- and 485-nm signals and the 405/485 ratio were continuously monitored by a software FASTINCA 1.03 (Nikon Corp.).  $[Ca^{2+}]_i$  was calculated from the formula established by Grynkiewicz *et al.* (40):  $[Ca^{2+}]_i = K_d \times \beta \times [(R - R_{min}) / (R_{max} - R)]$ , where  $K_d$  is the dissociation constant for indo-1 (250 nM),  $\beta$  is the fluorescence ratio between the signal at 485 nm in calcium-free medium and the signal at 485 nm in calcium-saturated medium,  $R$  is the 405/485 ratio of any unknown calcium concentration,  $R_{min}$  is the 405/485 ratio obtained after incubation of cells with 2 mM EGTA and 10  $\mu$ M A-23187 for 30 min at 22 C in culture medium in the dark (calcium-free conditions), and  $R_{max}$  is the 405/485 ratio obtained after incubation of cells with 2 mM  $CaCl_2$  and 10  $\mu$ M A-23187 for 30 min at 22 C in culture medium in the dark (calcium-saturated conditions). The averaged values were:  $R_{min} = 0.102 \pm 0.001$ ,  $R_{max} = 0.713 \pm 0.018$ , and  $\beta = 3.677 \pm 0.246$  ( $n = 90$ ). The effect of TRH on  $[Ca^{2+}]_i$  was tested by administering pulses of 10  $\mu$ M

TRH for 2 sec in the vicinity of the cells by means of a pressure ejection system.

### *In situ* hybridization of POMC mRNA

Quantification of POMC mRNA was performed by *in situ* hybridization using a nonradioactive procedure, as previously described (41). After removal of the culture medium, cells were rinsed with 0.01 M PBS (pH 7.2) and fixed in petri dishes with 4% paraformaldehyde in PBS for 15 min at room temperature. After three washes with PBS, cells were dehydrated in graded ethanol and stored at  $-80^{\circ}\text{C}$  until use. Before hybridization, cells were thawed, hydrated, and treated with 1% (vol/vol) Triton X-100 in PBS for 10 min. After two washes in PBS, cells were incubated with 5  $\mu\text{g}/\text{ml}$  proteinase K (Boehringer Mannheim, Mannheim, Germany) in PBS for 15 min at  $37^{\circ}\text{C}$ . The enzymatic activity was stopped with 2 mg/ml glycine in PBS. Cells were washed in PBS, postfixed with 4% paraformaldehyde in PBS for 5 min, washed again, and dehydrated in graded ethanol. Cells were prehybridized for 2 h at  $37^{\circ}\text{C}$  in a solution containing 50% (vol/vol) deionized formamide (Sigma),  $5 \times \text{SSPE}$  ( $20 \times \text{SSPE}$  is 3 M NaCl, 0.2 M  $\text{NaH}_2\text{PO}_4 \cdot \text{H}_2\text{O}$ , and 0.02 M EDTA, pH 7.4), 4% (vol/vol) dextran sulfate (stock 40%, wt/vol; Sigma),  $5 \times \text{Denhardt's}$  solution [ $50 \times \text{Denhardt's}$  solution is 1% (wt/vol) Ficoll type 400 (Pharmacia LKB), 1% (wt/vol) polyvinylpyrrolidone (Sigma), 1% (wt/vol) BSA, 0.1% (vol/vol) SDS (stock 10% (wt/vol); pH 7.2), 200  $\mu\text{g}/\text{ml}$  yeast transfer RNA (Boehringer Mannheim), 250  $\mu\text{g}/\text{ml}$  heat-denatured salmon sperm DNA (Sigma), and 2  $\mu\text{g}/\text{ml}$  polyadenylic acid (Sigma)]. The probe used in this study was the *EcoRI* 1184-bp insert of frog POMC complementary DNA subcloned into pGEM-3Zf (42). The fragment was purified by agarose gel electrophoresis and then digoxigenin-labeled by random priming using a digoxigenin DNA labeling kit (Boehringer Mannheim). Cells were covered with 200  $\mu\text{l}$  heat-denatured labeled POMC DNA probe (35 ng/dish) in the hybridization solution. Hybridization was performed in a humid chamber for 16 h at  $37^{\circ}\text{C}$ . The dishes were subsequently rinsed with  $2 \times \text{SSC}$  ( $20 \times \text{SSC}$  is 3 M NaCl and 0.3 M sodium citrate, pH 7.4) for 90 min,  $1 \times \text{SSC}$  for 90 min,  $0.5 \times \text{SSC}$  for 30 min at  $37^{\circ}\text{C}$ , and  $0.5 \times \text{SSC}$  for 30 min. Cells were washed in buffer 1 (100 mM Tris-HCl and 150 mM NaCl, pH 7.5) and incubated with 10 mM levamisole (Sigma) in buffer 2 (100 mM Tris-HCl, 150 mM NaCl, and 50 mM  $\text{MgCl}_2$ , pH 9.5) for 1 h. Then, cells were washed twice with buffer 1 and treated with 1% (wt/vol) blocking reagent (Boehringer Mannheim) for 30 min. Thereafter, cells were incubated with the alkaline phosphatase-labeled antidigoxigenin F(ab) fragment (Boehringer Mannheim) diluted 1:500 in buffer 1 for 4 h. After successive washes in buffers 1 and 2, cell-bound alkaline phosphatase activity was visualized by incubating the cells with the color solution [3.5  $\mu\text{l}/\text{ml}$  5-bromo-4-chloro-3-indolyl phosphate, 4.5  $\mu\text{l}/\text{ml}$  nitroblue tetrazolium salt (Boehringer Mannheim), and 0.24 mg/ml levamisole in buffer 2] for 16 h in the dark. The color reaction was stopped by rinsing the plates with buffer 1. Finally, they were mounted in buffer 1 plus glycerol (1:1).

Control staining included 1) pretreatment of dishes with 200  $\mu\text{g}/\text{ml}$  pancreatic ribonuclease A and 150 U/ml ribonuclease T (Sigma) in  $2 \times \text{SSC}$  for 1 h at  $37^{\circ}\text{C}$ , 2) omission of the probe, and 3) omission of the antidigoxigenin serum. As an additional control, the probe was tested in a cell type (human monocyte THP-1 cells) that does not express POMC. All controls were processed concurrently with samples using the same protocol.

POMC mRNA quantification was accomplished on a Dasher 386SX computer (Data General, Westboro, MA) equipped with IMAGO software for image analysis (SIVA Research Group, University of Córdoba, Córdoba, Spain) and connected by a CCTV camera (Hitachi, Tokyo, Japan) to a light microscope (Zeiss, Oberkochen, Germany). A  $\times 40$  objective and a stabilized light source were used. Before measuring each set of cells, Köhler focus was carried out to ensure an even and homogeneous illumination. The staining intensity (optical density) and the area of each individual cell (50 cells randomly selected/dish) were measured to calculate the integrated optical density. This parameter was correlated with the amount of POMC mRNA in the cell.

Background was evaluated for nonstained cells (10 cells/dish) and subtracted. To avoid within-experiment variations, control and treated cells were hybridized and measured simultaneously.

### Statistical analysis

Data were expressed as the mean  $\pm$  SE of the number of experiments indicated in each figure. The statistical analysis was preceded by a test for the joint assessment of normality (Kolmogorov-Smirnov test). Student's *t* test or Mann-Whitney rank sum test were applied depending on whether the distribution of data was parametric or nonparametric, respectively. Mathematical processing and statistical analysis were performed with the software SIGMAPLOT 5.01 and SIGMASTAT 1.02 (Jandel Scientific, Corte Madera, CA).

## Results

### Secretory activity of the melanotrope cell subpopulations

The absolute amount of  $\alpha\text{MSH}$  secreted during 2 h by HD cells under basal conditions ( $19.4 \pm 3.0$  ng/100,000 cells;  $n = 4$ ) was significantly less than that secreted by LD cells ( $96.0 \pm 13.8$  ng/100,000 cells;  $n = 4$ ;  $P < 0.001$ ). Incubation of the cells with 100 nM TRH provoked a significant stimulation of  $\alpha\text{MSH}$  secretion in the two melanotrope cell subsets (Fig. 1). The relative increase in  $\alpha\text{MSH}$  release was 2-fold higher in LD cells (+307%) than in HD cells (+141%).

### Analysis of $\alpha\text{MSH}$ -immunoreactive peptides secreted by the melanotrope cell subpopulations

Reverse phase HPLC analysis coupled with RIA quantification revealed the existence of four major forms of  $\alpha\text{MSH}$  in culture media of LD and HD cells (Fig. 2). Peaks I and II exhibited the same retention time as the sulfoxide derivatives of des- $\text{N}^{\alpha}$ -acetyl  $\alpha\text{MSH}$  and  $\alpha\text{MSH}$ , respectively, whereas peaks III and IV coeluted with des- $\text{N}^{\alpha}$ -acetyl  $\alpha\text{MSH}$  and  $\alpha\text{MSH}$ , respectively. A minor component (peak V) coeluting with diacetyl  $\alpha\text{MSH}$  was also resolved in culture medium of LD cells. The sulfoxide form of diacetyl  $\alpha\text{MSH}$  (retention time, 35 min) was not detected. Therefore, peaks I and III

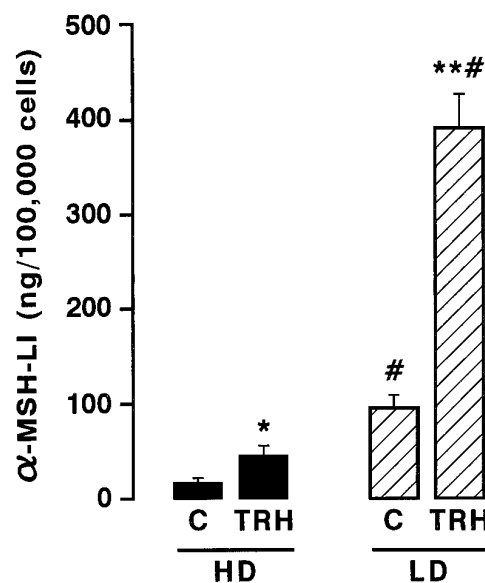

FIG. 1. Effect of TRH on  $\alpha\text{MSH}$  secretion from cultured frog melanotrope cell subpopulations. HD (solid bars) and LD cells (hatched bars) were incubated in the absence (C) or presence of 100 nM TRH for 2 h. The data represent the mean ( $\pm$ SEM) of four independent experiments. \*,  $P < 0.05$ ; \*\*,  $P < 0.001$  (vs. corresponding control). #,  $P < 0.001$  (vs. HD cells; all determined by Student's *t* test).

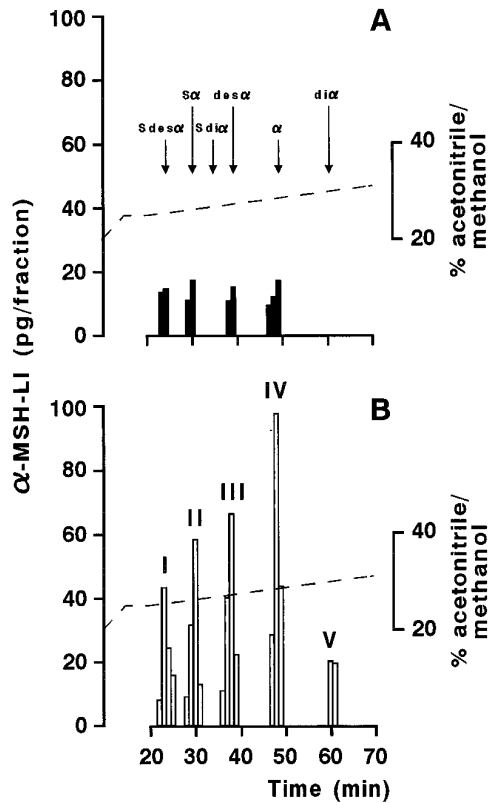

FIG. 2. Reverse phase HPLC analysis of  $\alpha$ MSH-immunoreactive peptides released by cultured frog melanotrope cell subpopulations. The culture media from HD (A) and LD (B) cells were purified on Sep-Pak  $C_{18}$  cartridges and chromatographed on a Lichrosorb RP-18 column. All fractions collected (1 ml each) were dried and assayed for  $\alpha$ MSH-like immunoreactivity ( $\alpha$ -MSH-LI). The arrows indicate the elution times of synthetic standards. The broken lines show the concentration of acetonitrile-methanol (80:20) in the eluting solvent. Sdes $\alpha$ , Sulfoxide derivative of des- $N^{\alpha}$ -acetyl  $\alpha$ MSH; S $\alpha$ , sulfoxide derivative of  $\alpha$ MSH; Sdi $\alpha$ , sulfoxide derivative of diacetyl  $\alpha$ MSH; des $\alpha$ , des- $N^{\alpha}$ -acetyl  $\alpha$ MSH;  $\alpha$ ,  $\alpha$ MSH; di $\alpha$ , diacetyl  $\alpha$ MSH.

represent the nonacetylated forms of  $\alpha$ MSH, whereas peaks II, IV, and V represent the acetylated forms.

Under basal conditions, the proportions of des- $N^{\alpha}$ -acetyl  $\alpha$ MSH and acetylated forms of  $\alpha$ MSH secreted by HD cells were not significantly different. Conversely, the amount of acetylated forms of  $\alpha$ MSH secreted by LD cells was significantly higher than that of des- $N^{\alpha}$ -acetyl  $\alpha$ MSH (Fig. 3). Specifically, the percentage of acetylated forms secreted by the two melanotrope cell subsets was 38.3% in HD cells and 57.9% in LD cells. Incubation of HD cells with 100 nM TRH produced a significant increase in the proportion of acetylated forms of  $\alpha$ MSH released by the cells ( $P < 0.05$ ; Fig. 3). In contrast, although TRH provoked a significant increase in the total amount of  $\alpha$ MSH released from LD cells ( $P < 0.001$ ), the proportions of nonacetylated and acetylated forms of  $\alpha$ MSH secreted under these conditions were similar (Fig. 3).

#### Measurement of $[Ca^{2+}]_i$ in the melanotrope cell subpopulations

Under basal conditions,  $[Ca^{2+}]_i$  was significantly lower in HD cells ( $97.5 \pm 13.3$  nM;  $n = 61$ ) than in LD cells ( $166.9 \pm$

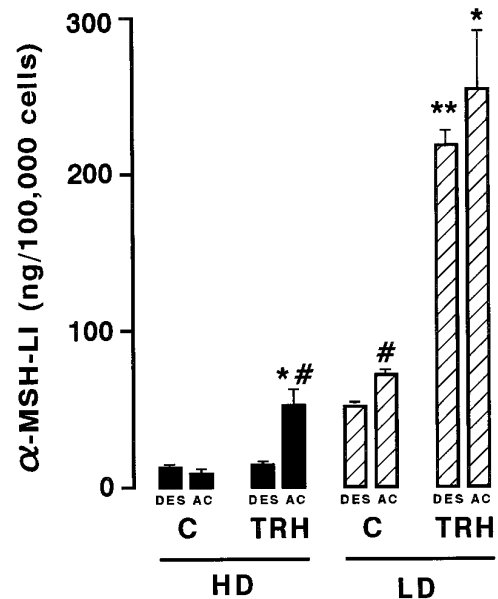

FIG. 3. Comparison of the concentrations of nonacetylated and acetylated forms of  $\alpha$ MSH released by cultured frog melanotrope cell subpopulations. HD (solid bars) and LD (hatched bars) cells were incubated in the absence (C) or presence of 100 nM TRH for 2 h. The culture medium was analyzed by HPLC and the  $\alpha$ MSH-immunoreactive peptides ( $\alpha$ -MSH-LI) were quantified by RIA. The nonacetylated form (DES) corresponds to des- $N^{\alpha}$ -acetyl  $\alpha$ MSH and its sulfoxide derivative. The acetylated form (AC) corresponds to  $\alpha$ MSH, its sulfoxide derivative, and diacetyl  $\alpha$ MSH. The data are the mean  $\pm$  SEM of three independent experiments. \*,  $P < 0.05$ ; \*\*,  $P < 0.01$  (vs. corresponding control). #,  $P < 0.05$  (vs. corresponding DES; all determined by Student's  $t$  test).

14.5 nM;  $n = 77$ ;  $P < 0.001$ ). Ejection of 10  $\mu$ M TRH in the vicinity of the cells provoked a rapid and massive increase in  $[Ca^{2+}]_i$  in the two subpopulations of melanotrope cells (Fig. 4). The percentages of cells responsive to TRH were similar in the two cell subsets, *i.e.* 62.3% in HD and 66.1% in LD cells. Sequential administration of TRH provoked a substantial attenuation of the  $Ca^{2+}$  response in both cell subpopulations (Fig. 4). Quantitative analyses of different parameters calculated from such experiments are summarized in Table 1. The maximal  $[Ca^{2+}]_i$  achieved after the first stimulation was significantly higher in LD cells than in HD cells ( $P < 0.01$ ). In contrast, the percentage of  $[Ca^{2+}]_i$  increment after the first ejection of TRH was significantly higher in HD cells than in LD cells ( $P < 0.01$ ). The lag between the administration of TRH and the maximum  $[Ca^{2+}]_i$  response was not significantly different in the two cell subpopulations. In both cell subsets, the lag period was significantly shorter after the second and third pulses than after the first pulse of TRH ( $P < 0.01$ ).

#### POMC mRNA expression in the melanotrope cell subpopulations

The percentages of POMC-positive cells identified by *in situ* hybridization were not significantly different ( $P > 0.05$ ) in HD cells ( $76.2 \pm 9.2\%$ ;  $n = 3$ ) and LD cells ( $70.6 \pm 6.2\%$ ;  $n = 3$ ); these values were in the same range as those measured previously by immunocytochemistry (81% and 76%,

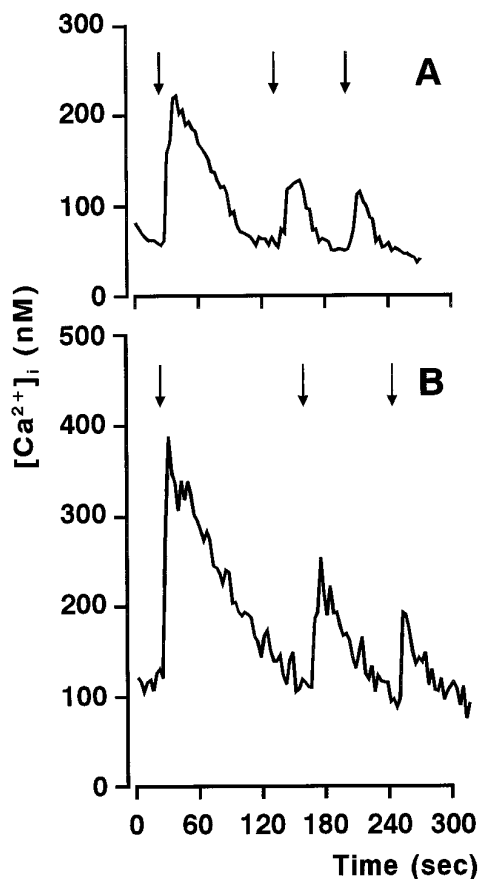

FIG. 4. Effect of repeated pulses of TRH on  $[Ca^{2+}]_i$  in cultured frog melanotrope cell subpopulations. Each figure represents a representative recording from HD (A) and LD (B) cells. The arrows indicate the onset of TRH application ( $10 \mu M$ ; 2 sec). The number of cells studied was 53 in A and 62 in B.

respectively) (35). Densitometric quantification of POMC mRNA levels showed that the mRNA content was 1.8-fold higher in LD cells than in HD cells ( $P < 0.01$ ). Incubation of the cells with TRH for 2 h caused a modest increase in POMC mRNA levels in both HD and LD cells ( $22.1 \pm 9.9\%$  and  $26.0 \pm 6.4\%$ , respectively); the effect of TRH was significant ( $P < 0.05$ ) only in LD cells (Fig. 5).

### Discussion

The present study has demonstrated that the frog pars intermedia is composed of two melanotrope cell subsets that exhibit distinct secretory activities,  $\alpha MSH$  acetylation rates,  $[Ca^{2+}]_i$  patterns, and POMC mRNA contents.

#### Functional heterogeneity of melanotrope cell subpopulations under basal conditions

Separation of pituitary cells by density gradients has previously demonstrated the existence of cell subpopulations exhibiting differential secretory activity. For instance, in aging rats (43) and prepubertal pigs (11), HD somatotrope cells were found to secrete higher amounts of GH than LD cells. Reverse hemolytic plaque assay and immunoblotting techniques have also shown that individual pituitary cells be-

TABLE 1. Characteristics of the effect of TRH on  $[Ca^{2+}]_i$  in HD and LD melanotrope cells in primary culture

|                                               | Pulse | HD cells           | LD cells               |
|-----------------------------------------------|-------|--------------------|------------------------|
| % of cells responding to TRH                  |       | 62.3               | 66.1                   |
| Basal $[Ca^{2+}]_i$ (nM)                      | 1     | $95.2 \pm 12.2$    | $162.8 \pm 10.8^a$     |
|                                               | 2     | $89.0 \pm 11.9$    | $138.0 \pm 10.3^b$     |
|                                               | 3     | $70.5 \pm 7.8$     | $108.8 \pm 14.4^c$     |
| Maximal $[Ca^{2+}]_i$ (nM)                    | 1     | $285.8 \pm 29.1$   | $347.9 \pm 15.6^b$     |
|                                               | 2     | $203.4 \pm 30.4^c$ | $249.0 \pm 13.1^{d,e}$ |
|                                               | 3     | $173.5 \pm 24.4$   | $201.3 \pm 19.2^c$     |
| $[Ca^{2+}]_i$ increment (%)                   | 1     | $255.3 \pm 37.0$   | $145.4 \pm 20.4^b$     |
|                                               | 2     | $129.9 \pm 17.2^c$ | $112.8 \pm 21.8^c$     |
|                                               | 3     | $140.2 \pm 19.2$   | $128.5 \pm 32.3$       |
| Time for maximal increment (sec) <sup>f</sup> | 1     | $15.4 \pm 1.8$     | $10.8 \pm 0.8^d$       |
|                                               | 2     | $13.9 \pm 1.5$     | $11.3 \pm 0.8$         |
|                                               | 3     | $11.6 \pm 0.5$     | $10.5 \pm 1.3$         |
| Response duration (sec) <sup>g</sup>          | 1     | $83.4 \pm 8.4$     | $72.3 \pm 5.3$         |
|                                               | 2     | $53.0 \pm 5.2^h$   | $52.5 \pm 6.0^e$       |
|                                               | 3     | $47.1 \pm 5.8$     | $48.3 \pm 5.2$         |

1, 2, and 3 refer to the nth pulse of TRH administered. Measurements were carried out on LD ( $n = 53$ ) and HD ( $n = 62$ ) melanotrope cells from at least four separate experiments. Significance was determined by Mann-Whitney rank sum test.

<sup>a</sup>  $P < 0.001$  vs. corresponding pulse in HD cells.

<sup>b</sup>  $P < 0.01$  vs. corresponding pulse in HD cells.

<sup>c</sup>  $P < 0.05$  vs. preceding pulse for TRH in each parameter.

<sup>d</sup>  $P < 0.05$  vs. corresponding pulse in HD cells.

<sup>e</sup>  $P < 0.001$  vs. preceding pulse for TRH in each parameter.

<sup>f</sup> Time required to achieve the maximal increase in  $[Ca^{2+}]_i$  after TRH administration.

<sup>g</sup> Time comprised between the administration of TRH and the recovering of  $[Ca^{2+}]_i$  basal levels.

<sup>h</sup>  $P < 0.01$  vs. preceding pulse for TRH in each parameter.

longing to the same phenotype may differ in their secretory activity (2, 8, 44). The present study indicates that the amount of  $\alpha MSH$  secreted by LD melanotrope cells during a 2-h incubation is 5 times higher than that secreted by HD cells. In agreement with these data, studies conducted on rat lactotrope cells (which exhibit a number of functional similarities with amphibian melanotrope cells) have shown that LD cells secrete more PRL than HD cells (9).

It is well established that the N-terminal acetylation of  $\alpha MSH$  is an important posttranslational event that determines the biological activity of the peptide (21). As in amphibians, acetylation of  $\alpha MSH$  occurs just before or during the exocytotic process (22, 23), we have investigated the acetylation activity in each melanotrope cell subpopulation. HPLC analysis of conditioned culture medium confirmed that LD cells have a higher secretory rate than HD cells and revealed that HD cells secrete a lower proportion of acetylated forms of  $\alpha MSH$  than LD cells. These findings indicate that the two melanotrope cell subsets exhibit distinct secretory patterns; LD cells have a higher secretory and acetylation activity than HD cells. As the amount of biologically active (*i.e.* acetylated) forms of  $\alpha MSH$  released by LD cells is 8 times higher than that released by HD cells, our data indicate that LD cells must play a predominant role in the maintenance of skin pigmentation.

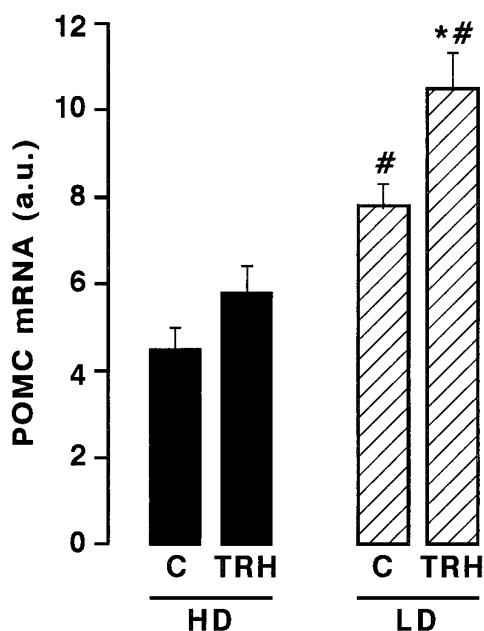

FIG. 5. Quantification of POMC mRNA in cultured frog melanotrope cell subpopulations. This figure shows a representative profile of POMC mRNA content in HD (solid bars) and LD (hatched bars) cells in the absence (C) or presence of 100 nM TRH for 2 h. The data are expressed in arbitrary units. \*,  $P < 0.05$  (vs. corresponding control); #,  $P < 0.001$  (vs. HD cells; both determined by Mann-Whitney rank sum test).

The relationship between  $[Ca^{2+}]_i$  and secretory activity of melanotrope cells is well documented in mammals (45) and amphibians (46, 47). We thus compared the resting  $[Ca^{2+}]_i$  in the two subpopulations of frog melanotrope cells. Our data revealed that  $[Ca^{2+}]_i$  was higher in LD than in HD cells, indicating that the elevated secretory rate of the LD cell subset can be accounted for by a high basal  $[Ca^{2+}]_i$ . Studies conducted in *Xenopus laevis* melanotrope cells have shown that the N-type calcium channel blocker  $\omega$ -conotoxin inhibits spontaneous  $Ca^{2+}$  oscillations, whereas the L-type calcium channel blocker nifedipine has no effect (48), indicating that N-type voltage-operated  $Ca^{2+}$  channels are responsible for maintenance of basal  $[Ca^{2+}]_i$ . In frog melanotrope cells, both N- and L-type  $Ca^{2+}$  channels have been characterized (49, 50). Whether the higher  $[Ca^{2+}]_i$  observed in LD cells can be ascribed to an increased density in N-type  $Ca^{2+}$  channels awaits further investigations.

A number of studies have demonstrated a correlation between hormone secretion and gene transcription in endocrine cells. For instance, in rats, LD lactotrope cells exhibit both a high rate of PRL secretion and a high concentration of PRL mRNA (9). Consistent with this concept, the present study revealed that frog LD melanotrope cells contain a higher amount of POMC transcripts than HD cells. We have previously shown that LD melanotrope cells are less granulated and contain a lower concentration of  $\alpha$ MSH than HD cells (35). Taken together, these observations suggest that LD cells display a high transcriptional activity, which contributes to replenish their POMC store and compensate their elevated secretory rate. In contrast, HD melanotrope cells, with a lower secretory capacity, would store the synthesized

hormone in secretory granules and release it at a much lower rate.

#### Effect of TRH on the melanotrope cell subpopulations

It has previously been shown that TRH is a potent  $\alpha$ MSH-releasing factor in frogs (29, 30, 51, 52) and toads (31). We thus compared the responses of the two melanotrope cell subsets to TRH. The present data indicate that TRH was more potent in stimulating  $\alpha$ MSH release from LD than HD cells. These data are consistent with other reports showing variations in the responsiveness of rat lactotrope cells to TRH (53–55).

In amphibians, acetylation of  $\alpha$ MSH is a regulated process that can be modulated by dopamine (26, 27). In fish, TRH administration specifically enhances the release of diacetyl  $\alpha$ MSH (56). Paradoxically, the effect of TRH on acetylation of  $\alpha$ MSH has never been investigated in amphibians. The present study demonstrated that TRH causes an increase in the rate of acetylation of  $\alpha$ MSH in HD cells without affecting the proportion of acetylated  $\alpha$ MSH in LD cells. These data suggest that TRH stimulation causes recruitment of the quiescent HD cells that are stimulated to produce predominantly the biologically active, *i.e.* acetylated form, of  $\alpha$ MSH.

The mechanism of action of TRH has been investigated in detail in GH<sub>3</sub> cells (57–59). Activation of TRH receptors causes stimulation of phospholipase C, leading to calcium mobilization from intracellular stores. In amphibian melanotrope cells, TRH also activates polyphosphoinositide metabolism (32). We now show that TRH produces a marked increase in  $[Ca^{2+}]_i$  in the two melanotrope cell subpopulations. Repeated administration of TRH provoked an attenuation of the response, which can be ascribed to conversion of the receptor from a high to a low affinity state (60) probably due to receptor phosphorylation (61). Interestingly, the maximum  $[Ca^{2+}]_i$  evoked by TRH activation was observed in LD cells. It has been shown that in rat melanotrope cells, a certain  $[Ca^{2+}]_i$  threshold is required to trigger exocytosis (45). Therefore, the greater responsiveness of LD melanotrope cells to TRH may be accounted for at least in part by the higher efficacy of TRH to induce calcium mobilization in the LD cell subset.

Finally, we found that TRH caused a significant increase in POMC mRNA content in LD cells, but not in HD cells. The ability of TRH to activate POMC gene transcription is consonant with the more pronounced effect of TRH on the secretory capacity of the LD cell subpopulation. In summary, our data indicate that the predominant effect of TRH on  $\alpha$ MSH release from frog LD melanotrope cells is associated with a stronger effect on  $[Ca^{2+}]_i$  elevation and an increase in POMC mRNA level in the LD cell subpopulation.

#### Physiological relevance of the existence of melanotrope cell subpopulations

The phenomenon of cell heterogeneity has been described for various types of pituitary cells (12, 35, 43, 62), but the physiological relevance of this phenomenon has been difficult to interpret due to the complexity of the regulation and the wide range of functions controlled by each endocrine cell type. In amphibians, it is reasonable to assume that the heterogeneity of melanotrope cells must be directly related to

their main physiological role, that is the regulation of skin pigmentation (20). Numerous studies have reported the effects of background color adaptation on the activity of pars intermedia cells in the toad *Xenopus laevis*. In particular, it has been shown that melanotrope cells from black background-adapted animals exhibit a high biosynthetic and secretory activity (63). It has also been reported that in the medium of perifused neurointermediate lobes from dark-adapted toads, the proportion of acetylated  $\alpha$ MSH is much higher than that in the medium from white-adapted animals (25). Similarly, the POMC gene is actively expressed during adaptation of *Xenopus laevis* to a black background (64). These observations strongly suggest that LD cells, which exhibit an intense secretory activity, a high acetylation rate, and an elevated POMC mRNA content, are actually responsible for the process of skin color adaptation. In support of this hypothesis, De Rijk *et al.* (65) reported that pars intermedia cells from black-adapted *Xenopus laevis* are scarcely granulated and possess a developed rough endoplasmic reticulum; in other words, they have the same morphological characteristics as *Rana ridibunda* LD cells (35).

The heterogeneity of melanotrope cells in the frog pars intermedia is consistent with the idea of a cell secretory cycle by which the cells may regulate  $\alpha$ MSH secretion in a flexible and balanced way. The relative importance of each subpopulation may then depend on the amount of hormone required in a particular physiological state. Therefore, further investigations are needed to elucidate the implication of cell heterogeneity in the process of skin color adaptation.

### Acknowledgments

We are indebted to Drs. R. H. Andreatta and V. Rasetti (Ciba-Geigy, Basel, Switzerland) for their generous gift of  $\alpha$ MSH standards, and to Dr. Ch. López-Pedraza (Centro de Investigación Biomédica, Hospital Universitario Reina Sofía, Córdoba, Spain) for providing human monocyte THP-1 cells.

### References

- Hopkins CR, Farquhar MG 1973 Hormone secretion by cells dissociated from rat anterior pituitaries. *J Cell Biol* 59:276–303
- Luque EH, Muñoz de Toro M, Smith PF, Neill JD 1986 Subpopulations of lactotropes detected with the reverse hemolytic plaque assay show differential responsiveness to dopamine. *Endocrinology* 118:2120–2124
- Lloyd JM, Childs GV 1988 Differential storage and release of luteinizing hormone and follicle-stimulating hormone from individual gonadotropes separated by centrifugal elutriation. *Endocrinology* 122:1282–1290
- Schwartz J 1990 Evidence for intrapituitary intercellular control of adrenocorticotropin secretion. *Mol Cell Endocrinol* 68:77–83
- Dobado-Berrios PM, Ruiz-Navarro A, Torronteras R, Gracia-Navarro F 1992 Application of an optimized immunostaining technique to evaluate the heterogeneous secretory response from porcine somatotropes by cell blotting. *J Histochem Cytochem* 40:1715–1724
- Kurosumi K 1991 Ultrastructural immunocytochemistry of the adenohypophysis in the rat: a review. *J Electron Microscop Tech* 19:42–56
- Torronteras R, Castaño JP, Almadén Y, Ruiz-Navarro A, Gracia-Navarro F 1993 Hormonal storage patterns and morphological heterogeneity of porcine gonadotrope cells during postnatal development. *Mol Cell Endocrinol* 97:51–59
- Boockfor FR, Hoeffler JP, Frawley LS 1986 Analysis by plaque assays of GH and prolactin release from individual cells in cultures of male pituitaries. Evidence for functional heterogeneity within rat mammotrope and somatotrope populations. *Neuroendocrinology* 42:64–70
- Velkeniers B, Hooghe-Peters EL, Hooghe R, Belayew A, Smets G, Claeys A, Robberecht P, Vanhaelst L 1988 Prolactin cell subpopulations separated on discontinuous Percoll gradient: an immunocytochemical, biochemical, and physiological characterization. *Endocrinology* 123:1619–1630
- Snyder G, Hymer WC, Snyder J 1977 Functional heterogeneity in somatotrophs isolated from the rat anterior pituitary. *Endocrinology* 101:788–799
- Castaño JP, Torronteras R, Ramírez JL, Gribouval A, Sánchez-Hormigo A, Ruiz-Navarro A, Gracia-Navarro F 1996 Somatostatin increases growth hormone (GH) secretion in a subpopulation of porcine somatotropes: evidence for functional and morphological heterogeneity among porcine GH-producing cells. *Endocrinology* 137:129–136
- Torronteras R, Dobado-Berrios PM, García-Navarro S, Malagón MM, Gracia-Navarro F 1995 Heterogeneous response of porcine gonadotrope to gonadotropin releasing hormone (GnRH) during postnatal development. *Mol Cell Endocrinol* 112:203–213
- Kazemzadeh M, Velkeniers B, Herregodts P, Collumbien R, Finné E, Derde MP, Vanhaelst L, Hooghe-Peters EL 1992 Differential dopamine-induced prolactin mRNA levels in various prolactin-secreting cell (sub)populations. *J Endocrinol* 132:401–409
- Dobado-Berrios PM, Ruiz-Navarro A, Almadén Y, Malagón MM, Garrido JC, Ramírez-Gutiérrez JL, Gracia-Navarro F 1996 Heterogeneity of growth hormone (GH)-producing cells in aging male rats: ultrastructure and GH gene expression in somatotrope subpopulations. *Mol Cell Endocrinol* 118:181–191
- Stoeckel ME, Dellman HD, Porte A, Gertner C 1971 The rostral zone of the intermediate lobe of the mouse hypophysis, a zone of particular concentration of corticotropic cells. A light and electron microscopic study. *Z Zellforsch Mikrosk Anat* 122:310–322
- Mains RE, Eipper BA, Ling N 1977 Common precursor to corticotropins and endorphins. *Proc Natl Acad Sci USA* 74:3014–3018
- Doerr-Schott J 1980 Immunohistochemistry of the adenohypophysis of non-mammalian vertebrates. *Acta Histochem* 22:185–223
- Vaudry H, Jenks BG, van Overbeeke AP 1984 Biosynthesis, processing and release of pro-opiomelanocortin related peptides in the intermediate lobe of the pituitary gland of the frog (*Rana ridibunda*). *Peptides* 5:905–912
- Martens GJM, Jenks BG, van Overbeeke AP 1982 Biosynthesis of pairs of peptides related to melanotropin, corticotropin and endorphins in the pars intermedia of the amphibian pituitary gland. *Eur J Biochem* 122:1–10
- Bagnara JT, Hadley ME 1973 In: Bern HA (ed) *Chromatophores and Color Change: The Comparative Physiology of Animal Pigmentation*. Prentice Hall, Englewood Cliffs
- Rudman D, Hollins BM, Kutner MH, Moffitt SD 1983 Three types of  $\alpha$ -melanocyte-stimulating hormone: bioactivities and half-lives. *Am J Physiol* 245:47–54
- Martens GJM, Jenks BG, van Overbeeke AP 1981 N $\alpha$ -acetylation is linked to  $\alpha$ -MSH release from pars intermedia of the amphibian pituitary gland. *Nature* 294:558–559
- Vaudry H, Jenks BG, van Overbeeke AP 1983 The frog pars intermedia contains only the non-acetylated form of  $\alpha$ -MSH. Acetylation to generate  $\alpha$ -MSH occurs during the release process. *Life Sci* 33:97–100
- Dores RM, Truong T, Steveson TC 1992 Detection and partial characterization of proopiomelanocortin-related end-products from pars intermedia of the toad, *Bombina orientalis*. *Gen Comp Endocrinol* 87:197–207
- Van Strien FJC, Galas L, Jenks BG, Roubos EW 1995 Differential acetylation of pro-opiomelanocortin-derived peptides in the pituitary gland of *Xenopus laevis* in relation to background adaptation. *J Endocrinol* 146:159–167
- Jenks BG, Verburg van Kemenade BML, Tonon MC, Vaudry H 1985 Regulation of biosynthesis and release of pars intermedia peptides in *Rana ridibunda*: dopamine affects both acetylation and release of  $\alpha$ -MSH. *Peptides* 6:913–921
- Verburg-van Kemenade BML, Jenks BG, Smits RJM 1987 N-terminal acetylation of MSH in the pars intermedia of *Xenopus laevis* is a physiologically regulated process. *Neuroendocrinology* 46:289–296
- Tonon MC, Desrués L, Lamacz M, Chartrel N, Jenks BG, Vaudry H 1993 Multihormonal regulation of pituitary melanotrophs. In: Vaudry H, Eberle A (eds) *The Melanotropic Peptides*. New York Academy of Science, New York, pp 175–187
- Tonon MC, Leroux P, Leboulenger F, Delarue C, Jégou S, Fresel J, Vaudry H 1980 Thyrotropin releasing hormone stimulates the release of melanotropin from neurointermediate lobe *in vitro*. *Life Sci* 26:869–875
- Tonon MC, Leroux P, Stoeckel ME, Jégou S, Pelletier G, Vaudry H 1983 Catecholaminergic control of  $\alpha$ -melanocyte-stimulating hormone ( $\alpha$ -MSH) release by frog neurointermediate lobe *in vitro*: evidence for direct stimulation of  $\alpha$ -MSH release by thyrotropin-releasing hormone. *Endocrinology* 112:133–141
- Verburg-van Kemenade BML, Jenks BG, Visser T, Tonon MC, Vaudry H 1987 Assessment of TRH as a potential MSH-release stimulating factor in *Xenopus laevis*. *Peptides* 8:69–76
- Desrués L, Tonon MC, Vaudry H 1990 Thyrotropin-releasing hormone stimulates polyphosphoinositide metabolism in the frog neurointermediate lobe. *J Mol Endocrinol* 5:129–136
- Childs GV 1990 Subsets of pituitary intermediate lobe cells bind CRH and secrete ACTH/CLIP in a reverse hemolytic plaque assay. *Peptides* 11:729–736
- Chronwall BM, Millington WR, Griffin WST, Unnerstall JR, O'Donohue TL 1987 Histological evaluation of the dopaminergic regulation of proopiomelanocortin gene expression in the intermediate lobe of the rat pituitary, involving *in situ* hybridization and [<sup>3</sup>H]thymidine uptake measurement. *Endocrinology* 120:1201–1211
- González de Aguilar JL, Tonon MC, Ruiz-Navarro A, Vaudry H, Gracia-

- Navarro F 1994 Morphological and functional heterogeneity of frog melanotrope cells. *Neuroendocrinology* 59:176–182
36. Tennant JR 1954 Evaluation of the trypan blue technique for determination of cell viability. *Transplantation* 2:685–694
  37. Tranchand Bunel D, Conlon JM, Chartrel N, Tonon MC, Vaudry H 1992 Isolation and structural characterization of peptides related to  $\alpha$ - and  $\gamma$ -melanocyte-stimulating hormone ( $\alpha$ -MSH) from the frog brain. *Mol Brain Res* 15:1–7
  38. Vaudry H, Tonon MC, Delarue C, Vaillant R, Kraicer J 1978 Biological and radioimmunological evidence for melanocyte stimulating hormones (MSH) of extrapituitary origin in the rat brain. *Neuroendocrinology* 27:9–24
  39. Gracia-Navarro F, Lamacz M, Tonon MC, Vaudry H 1992 Pituitary adenylate cyclase-activating polypeptide stimulates calcium mobilization in amphibian pituitary cells. *Endocrinology* 131:1069–1074
  40. Grynkiewicz G, Poenie M, Tsien RY 1985 A new generation of  $\text{Ca}^{2+}$  indicators with greatly improved fluorescence properties. *J Biol Chem* 260:3440–3450
  41. Malagón MM, Garrido JC, Dieuolis C, Hera C, Castrillo JL, Dobado-Berrios PM, Gracia-Navarro F 1996 Expression of the pituitary transcription factor GHF-1/PIT-1 in cell types of the adult porcine adenohypophysis. *J Histochem Cytochem* 44:621–627
  42. Hilaro E, Lihman I, Vaudry H 1990 Characterization of the cDNA encoding proopiomelanocortin in the frog *Rana ridibunda*. *Biochem Biophys Res Commun* 173:653–659
  43. Dobado-Berrios PM, Ruiz-Navarro A, López-Pedraza R, González de Aguilar JL, Torronteras R, Hidalgo-Díaz C, Gracia-Navarro F 1996 Heterogeneity of growth hormone (GH)-producing cells in aging male rats: *in vitro* GH releasing activity of somatotrope subpopulations. *Mol Cell Endocrinol* 123:127–137
  44. De Rijk EPCT, Terlou M, Crujisen PMJM, Jenks BG, Roubos EW 1992 Immunoblotting technique to study release of melanophore-stimulating hormone from individual melanotrope cells of the intermediate lobe of *Xenopus laevis*. *Cytometry* 13:863–871
  45. Thomas P, Surprenant A, Almers W 1990 Cytosolic  $\text{Ca}^{2+}$ , exocytosis and endocytosis in single melanotropes of the rat pituitary. *Neuron* 5:723–733
  46. Scheenen WJMJ, De Koning HP, Jenks BG, Vaudry H, Roubos EW 1994 The secretion of  $\alpha$ -MSH from *Xenopus* melanotropes involves calcium influx through  $\omega$ -conotoxin-sensitive voltage-operated calcium channels. *J Neuroendocrinol* 6:457–464
  47. Scheenen WJMJ, Jenks BG, Willems PHGM, Roubos EW 1994 Action of stimulatory and inhibitory  $\alpha$ -MSH secretagogues on spontaneous calcium oscillations in melanotrope cells of *Xenopus laevis*. *Pflugers Arch* 427:244–251
  48. Scheenen WJMJ, Jenks BG, Roubos EW, Willems PHGM 1994 Spontaneous calcium oscillations in *Xenopus laevis* melanotrope cells are mediated by  $\omega$ -conotoxin sensitive calcium channels. *Cell Calcium* 15:36–44
  49. Louiset E, Cazin L, Lamacz M, Tonon MC, Vaudry H 1988 Patch-clamp study of the ionic currents underlying action potentials in cultured frog pituitary melanotropes. *Neuroendocrinology* 48:507–515
  50. Valentijn JA, Louiset E, Vaudry H, Cazin L 1992 Voltage-dependent modulation of calcium current by GTPS and dopamine in cultured frog pituitary melanotropes. *Neurosci Lett* 138:216–220
  51. Leroux P, Tonon MC, Jegou S, Leboulenger F, Delarue C, Perroteau I, Netchitailo P, Kupryszewski G, Vaudry H 1982 In vitro study of frog (*Rana ridibunda* Pallas) neurointermediate lobe secretion by use of simplified perfusion system. I. Effect of TRH analogs upon  $\alpha$ -MSH release. *Gen Comp Endocrinol* 46:13–23
  52. Tonon MC, Leroux P, Oliver C, Jegou S, Leboulenger F, Delarue C, Coy DH, Vaudry H 1983 In vitro study of frog (*Rana ridibunda* Pallas) neurointermediate secretion by use of a simplified perfusion system. III. Effect of neuropeptides on  $\alpha$ -MSH secretion. *Gen Comp Endocrinol* 52:173–181
  53. Boockfor FR, Frawley LS 1987 Functional variations among prolactin cells from different pituitary regions. *Endocrinology* 120:874–879
  54. Nagy GM, Frawley LS 1990 Suckling increases the proportions of mammothropes responsive to various prolactin-releasing stimuli. *Endocrinology* 127:2079–2084
  55. Israel JM, Kukstas LA, Vincent JD 1990 Plateau potentials recorded from lactating rat enriched lactotroph cells are triggered by thyrotropin releasing hormone and shortened by dopamine. *Neuroendocrinology* 51:113–122
  56. Lamers AE, Flik G, Wendelaar Bonga SE 1994 A specific role for TRH in release of diacetyl  $\alpha$ -MSH in tilapia stressed by acid water. *Am J Physiol* 267:1302–1308
  57. Gershengorn MC 1989 Role of inositol lipid second messengers in regulation of secretion: studies of thyrotropin-releasing hormone action in pituitary cells. In: Oxford GS, Armstrong CM (eds) *Secretion and its Control*. Rockefeller UP, New York, pp 1–15
  58. Gollasch M, Kleuss C, Hescheler J, Wittig B, Schultz G 1993  $\text{G}_i$  and protein kinase C are required for thyrotropin-releasing hormone-induced stimulation of voltage-dependent  $\text{Ca}^{2+}$  channels in rat pituitary  $\text{GH}_3$  cells. *Proc Natl Acad Sci USA* 90:6265–6269
  59. Nelson EJ, Hinkle PM 1994 Thyrotropin-releasing hormone activates  $\text{Ca}^{2+}$  efflux. Evidence suggesting that a plasma membrane  $\text{Ca}^{2+}$  pump is an effector for a G-protein-coupled  $\text{Ca}^{2+}$ -mobilizing receptor. *J Biol Chem* 269:30854–30860
  60. Lamacz M, Tonon MC, Danger JM, Jenks BG, Kupryszewski G, Vaudry H 1987 Biphasic effect of thyrotropin-releasing factor (TRH) on  $\alpha$ -melanotropin secretion from frog intermediate lobe *in vitro*. *Mol Cell Endocrinol* 50:203–209
  61. Wojcikiewicz RJH, Tobin AB, Nahorski SR 1993 Desensitization of cell signalling mediated by phosphoinositidase C. *Trends Pharmacol Sci* 14:279–285
  62. Ingram DC, Keefe PD, Wooding FPB, Bicknell RJ 1988 Morphological characterization of lactotrophs separated from the bovine pituitary by rapid enrichment technique. *Cell Tissue Res* 252:655–659
  63. Wilson JF, Morgan MA 1979  $\alpha$ -Melanotropin-like substances in the pituitary and plasma of *Xenopus laevis* in relation to colour change responses. *Gen Comp Endocrinol* 38:172–182
  64. Ayoubi TAY, Jenks BG, Roubos EW, Martens GJM 1992 Transcriptional and posttranscriptional regulation of the proopiomelanocortin gene in the *pars intermedia* of the pituitary gland of *Xenopus laevis*. *Endocrinology* 130:3560–3566
  65. De Rijk EPCT, Jenks BG, Wendelaar Bonga SE 1990 Morphology of the *pars intermedia* and the melanophore-stimulating cells in *Xenopus laevis* in relation to background adaptation. *Gen Comp Endocrinol* 79:74–82
